# Supplementary figures and images for: Community-Academic Partnership: Establishing the Institute for Mental Health Research Early Psychosis Intervention Center
Source: Atypon-hosted journal article supplement (doi:10.1176/appi.ps.201700516), 2018-03-01

Figure 1. IMHR-EPICENTER Waiting Room

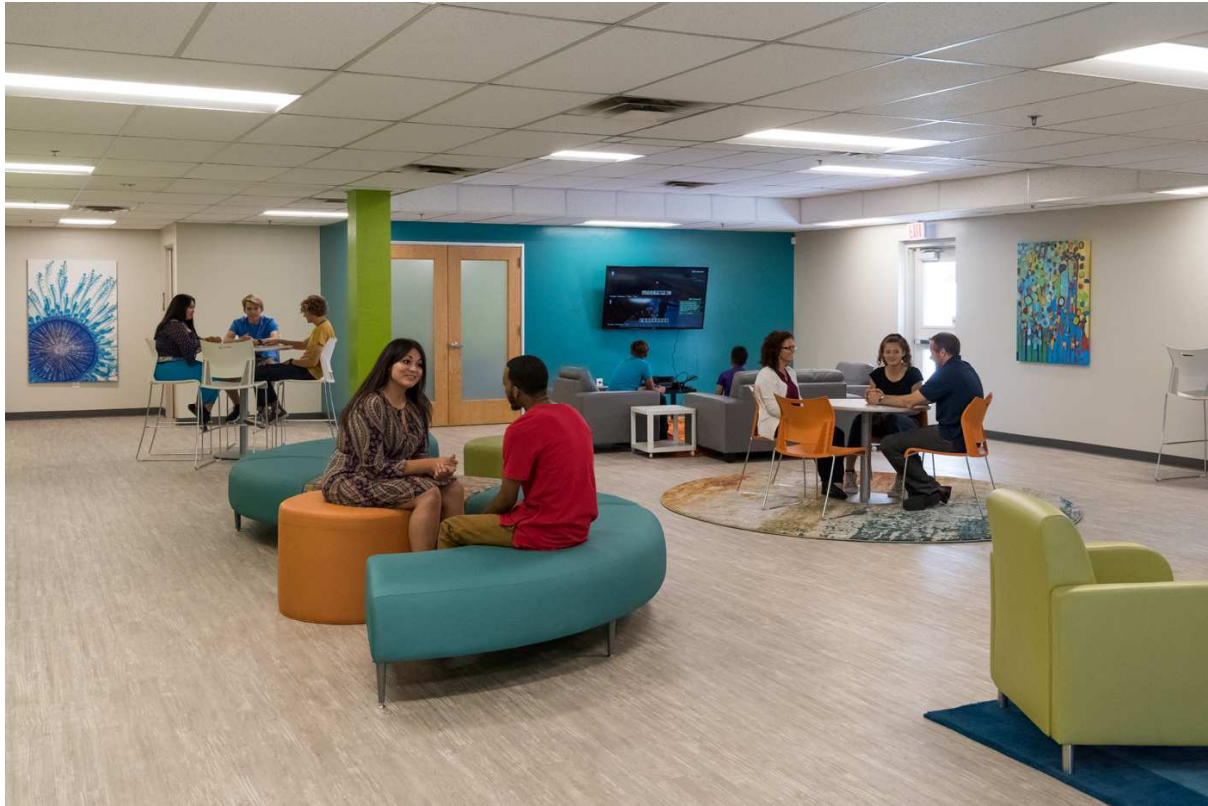

Supplement: appi.ps.201700516.ds001.pdf [file appi.ps.201700516.ds001.pdf]
